# Supplementary material
Source: publisher site journal article supplement (https://www.dovepress.com/article/401807)
Supplement: Supplementary file 1 [file get_supplementary_file.php]

**Supplementary materials**

**Supplementary table 1. Classification, pharmacology and mechanism of action of antibiotics used in this study**

| **Family** | **Antibiotic** | **Pharmacology** | **Mode of action** | **Reference** |
| --- | --- | --- | --- | --- |
| **ß-lactam Penicillin** | Piperacillin | Broad-spectrum semi-synthetic penicillin | Drug targeting binds penicillin binding proteins（PBP） at the cytoplasmic membrane, hinders the cross coupling process of linear dodecas accharide polymers outside the cytosol, and interferes with cell wall synthesis | 1, 2 |
| **ß-lactam Cephalosporin** | Ceftazidime | Broad-spectrum semi-synthetic third-generation cephalosporins,more antibacterial activity against gram-negative bacteria than first-generation and second-generation cephalosporins |
|  | Cefotaxime |
|  | Cefepime | The fourth generation of new broad-spectrum semi-synthetic cephalosporins | Binds to one or more PBPs of bacteria and affects bacterial cell wall synthesis and metabolism |
| **ß-lactam/ß-lactamase inhibitor** | Amoxicillin/clavulanic acid | Amoxicillin is a semi-synthetic broad-spectrum penicillin with a strong ability to penetrate cells; Clavulanic acid is the first clinical β- lactamase inhibitor | Penicillin target binding PBPs on the cytoplasmic membrane, hindering the cross coupling process of linear dodecas accharide polymers outside the cytosol, interfering with the synthesis of the cell wall; Clavulanic acid as β- Lactamase inhibitors, acetylation β - Lactamases, which inactivate the enzyme |
|  | Piperacillin/tazobactam | Piperacillin is a semi-synthetic penicillin antibiotic; Tazobactam β- Lactamase inhibitor | Tazobactam is the third generation β- Lactamase inhibitors that act antibacterial by inhibiting bacterial cell wall synthesis |
| **ß-lactam Carbapenems** | Imipenem | Artificial synthesis of broad spectrum antibiotics, resistant to β- Lactamases, but can be hydrolyzed by metallo β- Lactamase | Binding to PBPs1a, 1b, and 2 leads to inactivation of bacterial cell wall lysis |
|  | Meropenem | Binds to PBPs2,3 and 4, resulting in loss of bacterial cell wall lysis |
| **Single ring β- Lactam** | Amtreonam | Novel class of monoamide ring β- Lactam antibiotics with broad resistance to β- Lactamase stabilization | Binds to PBP3 and inhibits bacterial cell wall synthesis |
| **Aminoglycosides** | Gentamicin | Multicomponent broad-spectrum aminoglycoside antibiotics | It binds to a conserved 16SrRNA sequence at the A-site of the bacterial 30S ribosomal subunit, resulting in an incorrect mRNA translation and blocking protein synthesis |
|  | Amikacin | Semi synthetic broad spectrum aminoglycoside antibiotics derived from kanamycin with antimicrobial activity |
| **Fluoroquinolone** | Ciprofloxacin | Third generation broad-spectrum quinolone antibiotics that are fungicides | By inhibiting the activities of bacterial DNA polymerase and topoisomerase IV, the replication, repair, and transcription processes of DNA are inactivated, which rapidly reduces bacterial reproduction |
|  | Levofloxacin | Broad spectrum fourth generation synthetic quinolones |
| **Sulfonamides** | Sulfamethoxazole/trimethoprim（SMZ/TMP） | Sulfamethoxazole belongs to the intermediate acting sulfonamides and trimethoprim to the sulfonamide potentiators | SMZ inhibits dihydrofolate synthetase and interferes with the first step of folate synthesis;TMP acts on the second step of folate anabolism and selectively inhibits dihydrofolate reductase; both combinations of which can double block folate metabolism in bacteria |
| **Chloramphenicol** | Chloramphenicol | A broad-spectrum bacteriostatic agent that is bactericidal at high concentrations | Binds to the 50S subunit of bacterial ribose, inhibits transpeptidase, and prevents protein synthesis |
| **Tetracycline** | Tetracycline | Binds specifically to the ribosomal 30S subunit, histidyl tRNA impedes protein synthesis and inhibits bacterial growth |

**Supplementary table 2.** Analysis of risk factors for carbapenem-resistant *Klebsiella pneumoniae* (CRKP) and extended-spectrum β-lactamase-*Klebsiella pneumoniae* (ESBL-KP) infection

|  | **CRKP** | | **ESBL-KPN** | | |
| --- | --- | --- | --- | --- | --- |
|  | **OR (95%CI)** | **P-value** |  | **OR (95%CI)** | **P-value** |
| **Sex** |  |  | **Sex** |  |  |
| Female | 1 | NA | Female | 1 | NA |
| Male | 0.895(0.725-1.105) | 0.303 | **Male** | **1.174(1.025-1.345)** | **<0.05** |
| **Age, y** |  |  | **Age, y** |  |  |
| <1 | 1 | NA | <1 | 1 | NA |
| 1-20 | 0.185(0.093-0.369) | <0.05 | 1-20 | 0.079(0.041-0.151) | <0.05 |
| 21-50 | 0.704(0.354-1.398) | <0.05 | 21-50 | 0.571(0.352-0.925) | <0.05 |
| 51-70 | 0.533(0.369-0.771) | <0.05 | 51-70 | 0.892(0.701-1.135) | 0.352 |
| **71-80** | **1.552(1.176-2.050)** | **<0.05** | **71-80** | **1.304(1.109-1.533)** | **<0.05** |
| **81+** | **2.100(1.548-2.850)** | **<0.05** | **81+** | **1.315(1.061-1.631)** | **<0.05** |
| **Season** |  |  | **Season** |  |  |
| First quarter | 1 | NA | First quarter | 1 | NA |
| Second quarter | 1.173(0.889-1.547) | 0.26 | Second quarter | 1(0.828-1.209) | 0.997 |
| Third quarter | 0.703(0.532-0.928) | <0.05 | **Third quarter** | **1.318(1.103-1.574)** | **<0.05** |
| Fourth quarter | 0.976(0.728-1.311) | 0.874 | Fourth quarter | 0.667(0.558-0.796) | <0.05 |
| **Specimen type** |  |  | **Specimen type** |  |  |
| Sputum | 1 | NA | Sputum | 1 | NA |
| **Urine** | **2.320(1.758-3.061)** | **<0.05** | **Urine** | **3.158(2.558-3.899)** | **<0.05** |
| Blood | 0.489(0.308-0.778) | <0.05 | Blood | 0.418(0.302-0.579) | <0.05 |
| **Department** |  |  | **Department** |  |  |
| Non-ICU | 1 | NA | Non-ICU | 1 | NA |
| **ICU** | **4.778(3.826-5.976)** | **<0.05** | **ICU** | **3.126(2.700-3.619)** | **<0.05** |

**Notes:**

**Abbreviation:** CRKP, carbapenem-resistant Klebsiella pneumoniae; ESBL-KP, extended-spectrum β-lactamase-*Klebsiella pneumoniae;* ICU, Intensive care unit.

P<0.05 was considered statistically significant.

The items in bold represent the risk factors for CRKP and ESBL-KP infection.


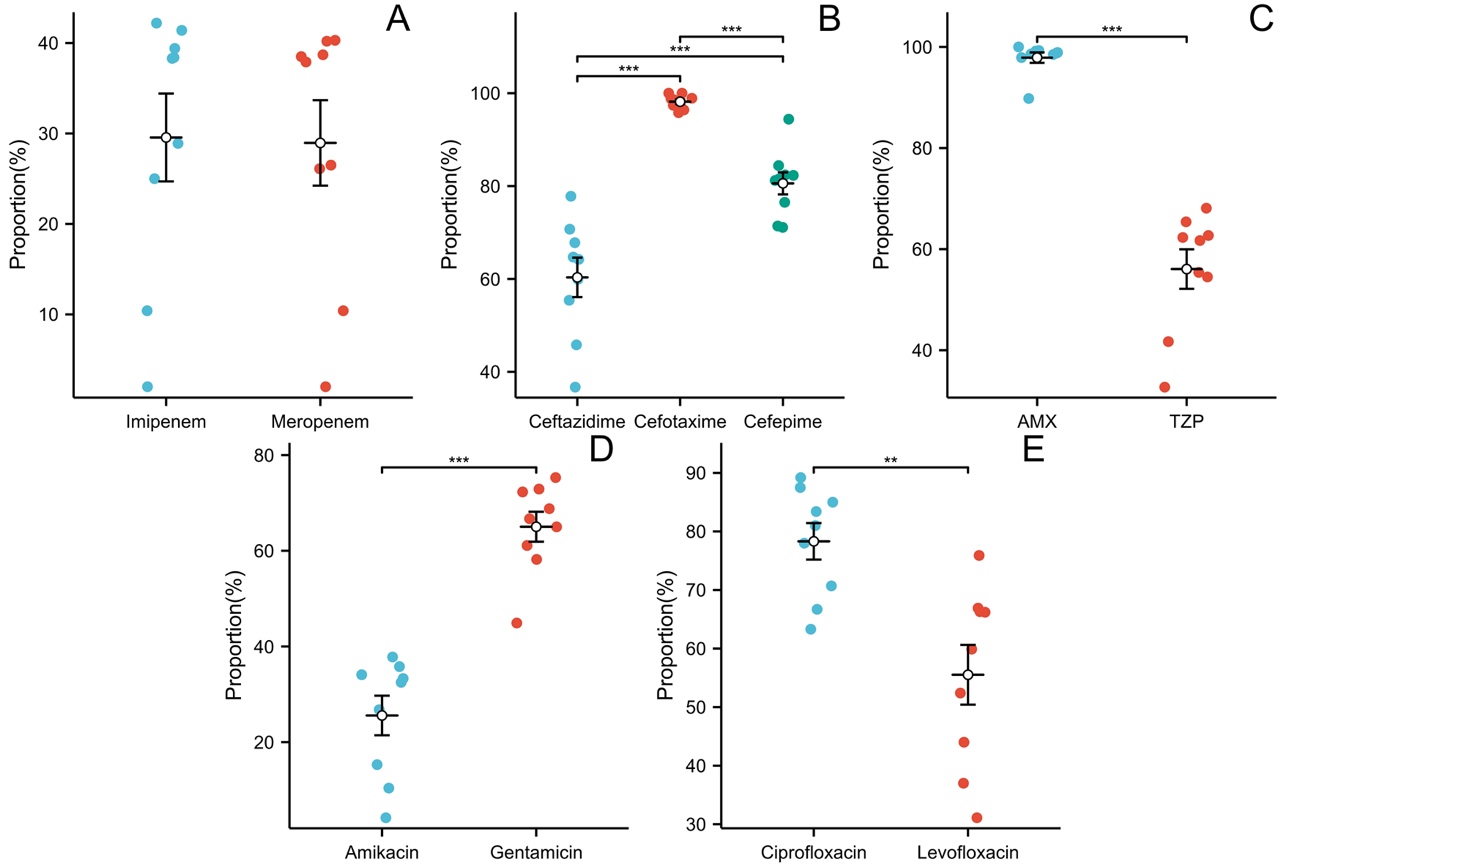


**Supplementary figure 1**. Scatter chart of the resistance rate of extended-spectrum β-lactamase-*Klebsiella pneumoniae* (ESBL-KP) to common antibiotics. (A-E) Carbapenem antibiotics, cephalosporin antibiotics, β_lactam/β_lactamase inhibitor antibiotics, aminoglycoside antibiotics, fluoroquinolone antibiotics. AMX, Amoxicillin/clavulanic acid; TZP, Piperacillin/tazobactam. "*" represents the size of P value, none * represents P value ≥ 0.05, * represents 0.01 ≤ P<0.05, * * represents 0.001 ≤ P<0.01, * * *represents 0.0001 ≤ P<0.001.


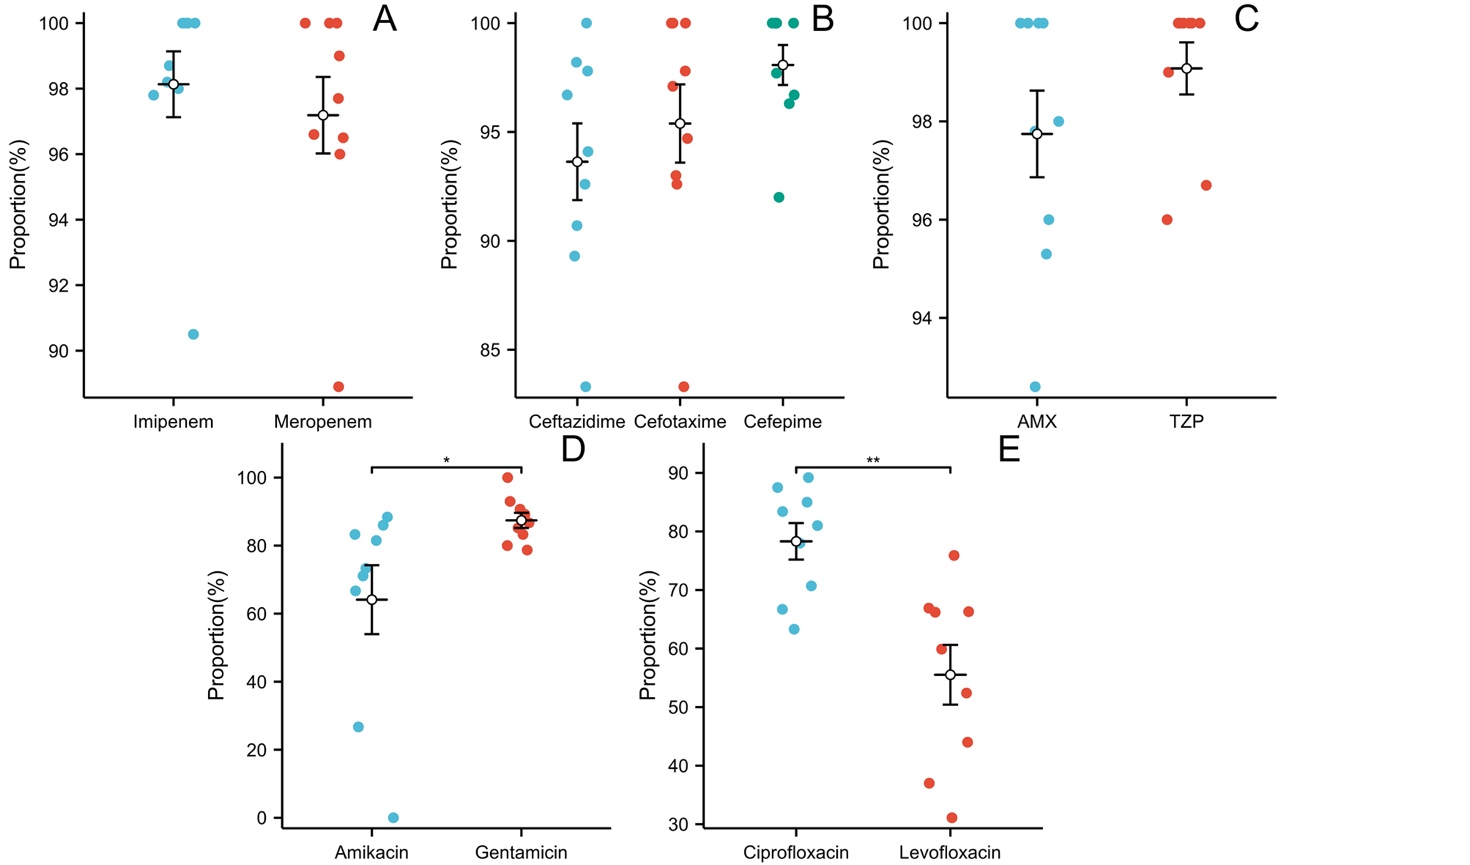


**Supplementary figure 2.** Scatter chart of the resistance rate of carbapenem-resistant *Klebsiella pneumoniae* (CRKP) to common antibiotics. (A-E) Carbapenem antibiotics, cephalosporin antibiotics, β_lactam/β_lactamase inhibitor antibiotics, aminoglycoside antibiotics, fluoroquinolone antibiotics. AMX, Amoxicillin/clavulanic acid; TZP, Piperacillin/tazobactam. "*" represents the size of P value, none * represents P value ≥ 0.05, * represents 0.01 ≤ P<0.05, * * represents 0.001 ≤ P<0.01, * * *represents 0.0001 ≤ P<0.001.

Reference

1. Issakhanian L, Behzadi P. Antimicrobial Agents and Urinary Tract Infections. *Curr Pharm Des*. 2019;25(12):1409-1423. doi:10.2174/1381612825999190619130216

2. Khonsari MS, Behzadi P, Foroohi F. The prevalence of type 3 fimbriae in Uropathogenic Escherichia coli isolated from clinical urine samples. *Meta Gene*. 2021;28(2)
